# Supplementary material
Source: publisher figshare collection journal article supplement (https://acs.figshare.com/ndownloader/files/4758031)
Supplement: Supplementary file 1 [file 4758031]

## **Supporting information**

# Double C-H Activation Results in Ru Complexes of a Neutral PCP Ligand With a Central Carbene Moiety

*Wei Weng<sup>1</sup>, Sean Parkin,<sup>2</sup> and Oleg V. Ozerov\*<sup>1</sup>*

<sup>1</sup>Department of Chemistry, Brandeis University, MS 015, 415 South Street, Waltham, MA  
02454.

<sup>2</sup> Department of Chemistry, University of Kentucky, Lexington, Kentucky, 40506

[ozarov@brandeis.edu](mailto:ozarov@brandeis.edu)

**Formation of (3-methoxyphenyl)isobutylketone (S2).** When 3-methoxyacetophenone (entry 4 in Table 1) was used as substrate in transfer hydrogenation, a small amount (4%) of compound **S2** was also isolated by chromatography. **S2** is likely the hydrogenation product of the  $\alpha,\beta$ -unsaturated ketone **S1** (unobserved) which may be formed from the condensation of 3-methoxyacetophenone and the isopropanol-derived acetone (Scheme S1).

**Scheme S1**

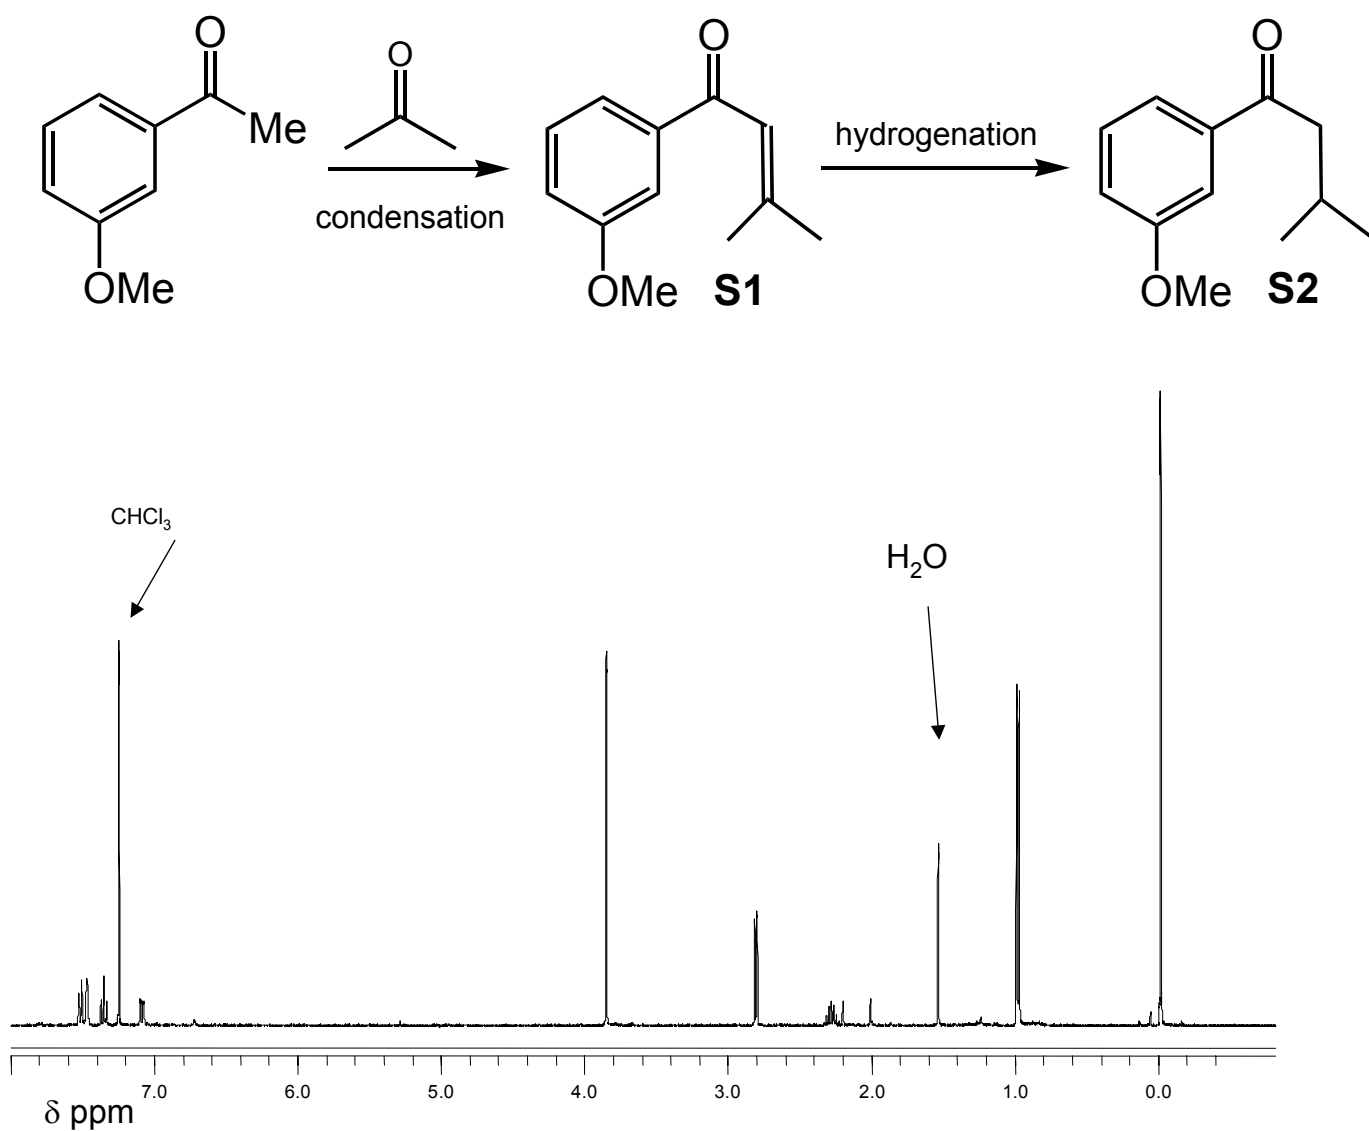

**Figure S1.**  $^1\text{H}$  NMR spectrum of **S2** in  $\text{CDCl}_3$  (silicon grease impurity at ca.  $\delta$  0 ppm).

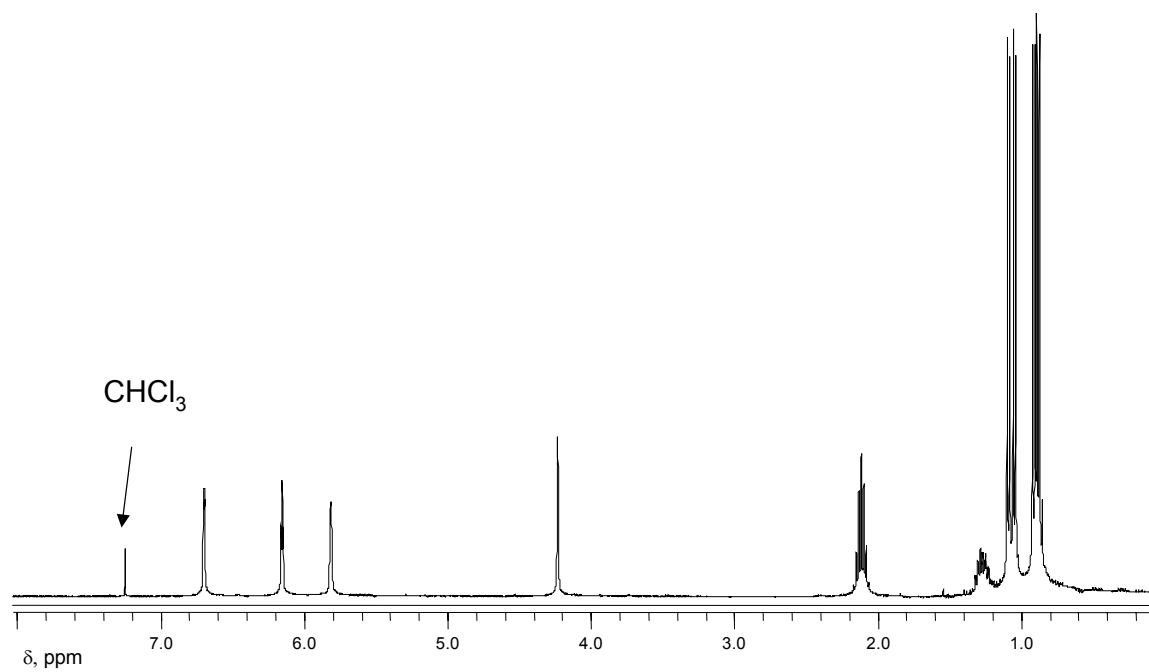

**Figure S2.**  $^1\text{H}$  NMR spectrum of  $\text{P}_2\text{CH}_2$  (**1**) in  $\text{CDCl}_3$  (traces of pentane present).

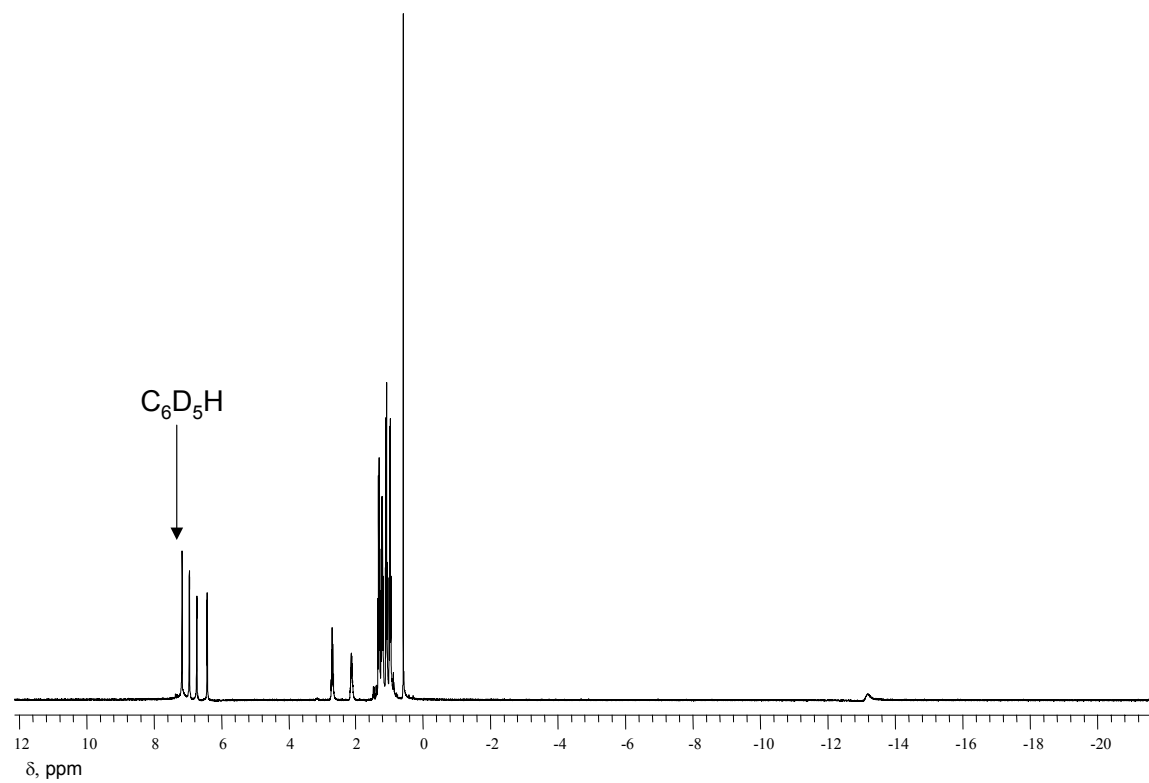

**Figure S3.**  $^1\text{H}$  NMR spectrum of  $(\text{P}_2\text{C}=\text{)RuHCl}(\text{NCMe})$  (**3**) in  $\text{C}_6\text{D}_6$ .

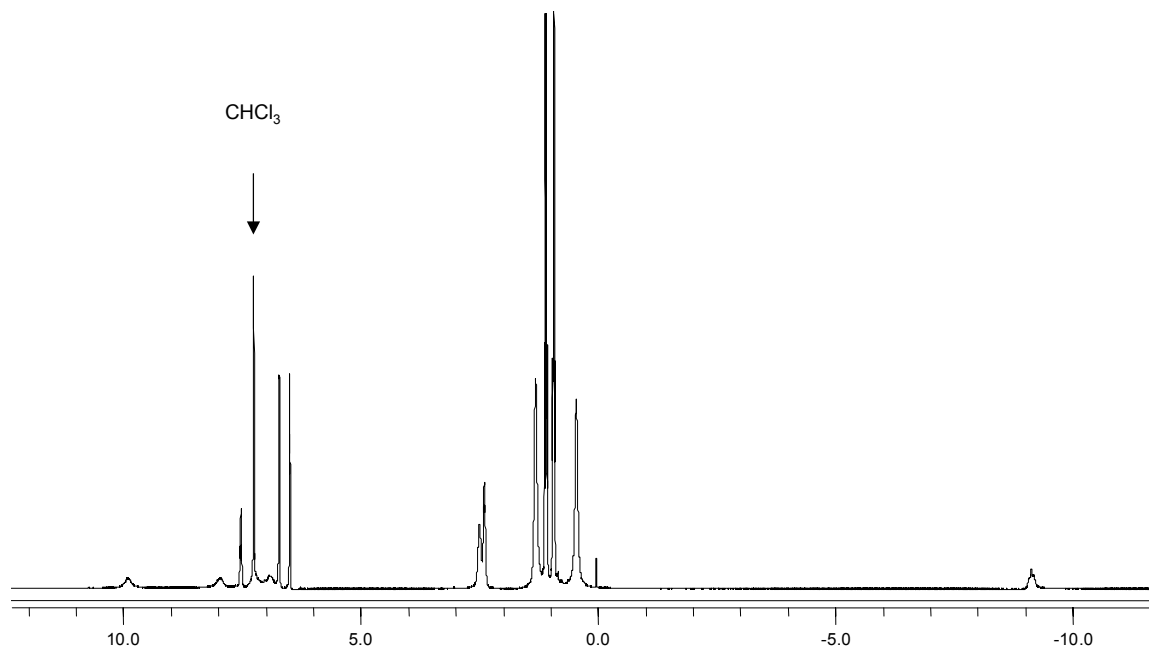

**Figure S4.**  $^1\text{H}$  NMR spectrum of  $(\text{P}_2\text{C}=\text{RuHCl}(\text{py}))$  (**4**) in  $\text{C}_6\text{D}_6$ .

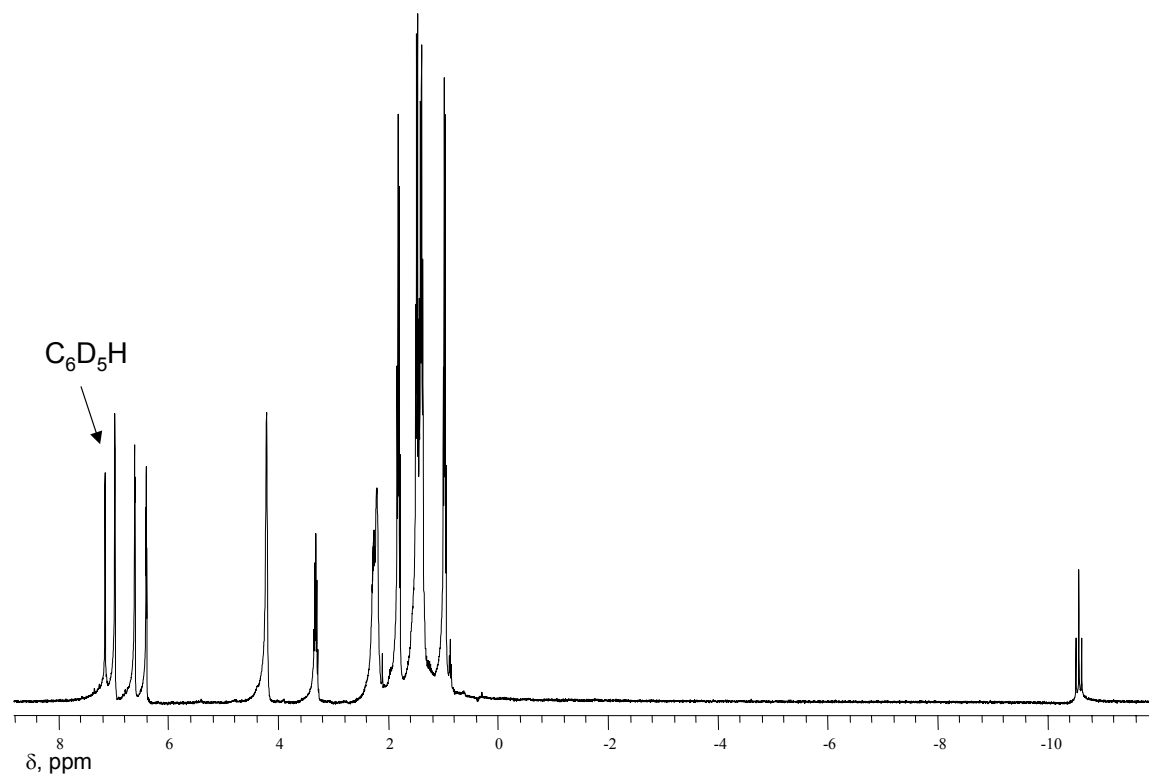

**Figure S5.**  $^1\text{H}$  NMR spectrum of  $(\text{P}_2\text{C}=\text{RuH}(\mu\text{-Cl})_2\text{Rh}(\text{COD}))$  (**6**) in  $\text{C}_6\text{D}_6$ .

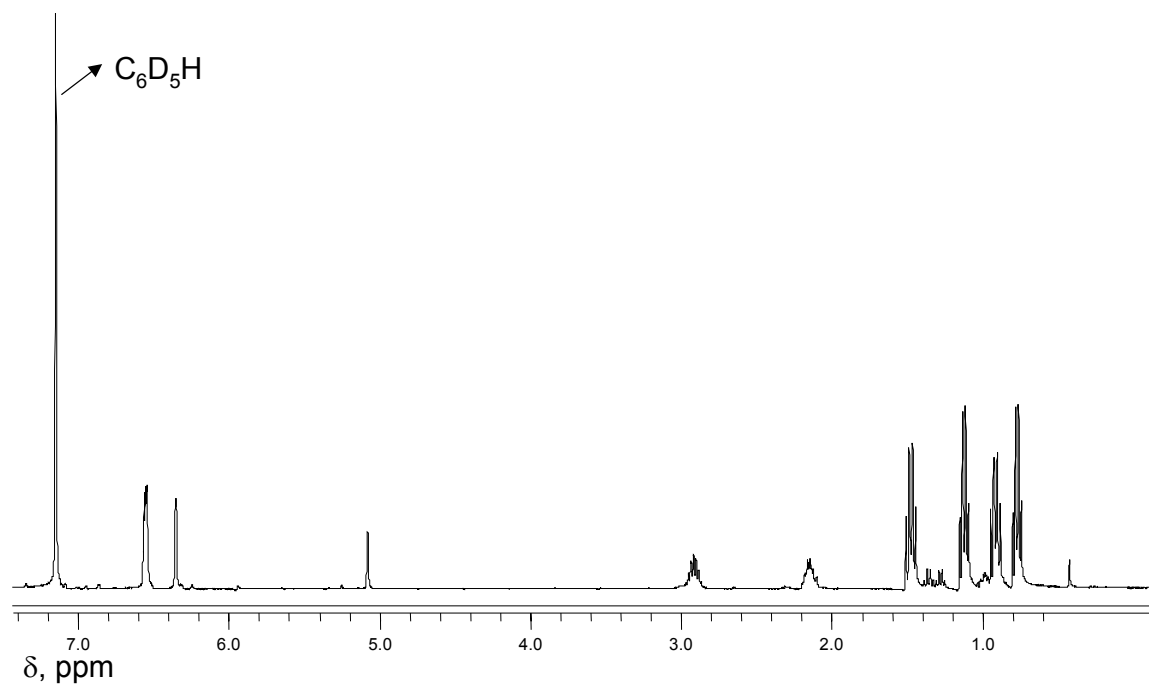

**Figure S6.**  $^1\text{H}$  NMR spectrum of  $(\text{P}_2\text{CH})\text{RuCl}(\text{CO})_2$  (**7a/b**) in  $\text{C}_6\text{D}_6$ .

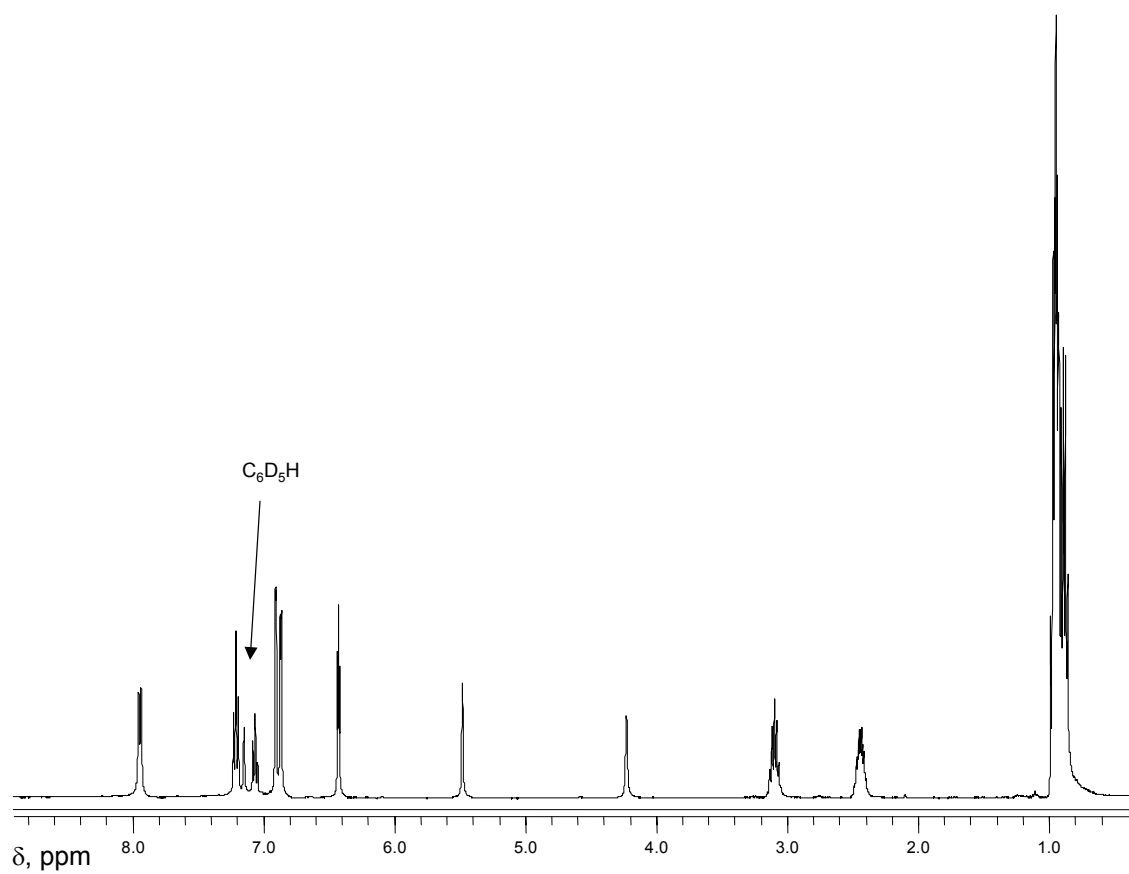

**Figure S7.**  $^1\text{H}$  NMR spectrum of  $(\text{P}_2\text{C}=\text{RuCl}(-\text{CPh}=\text{CH}_2))$  (**10**) in  $\text{C}_6\text{D}_6$ .

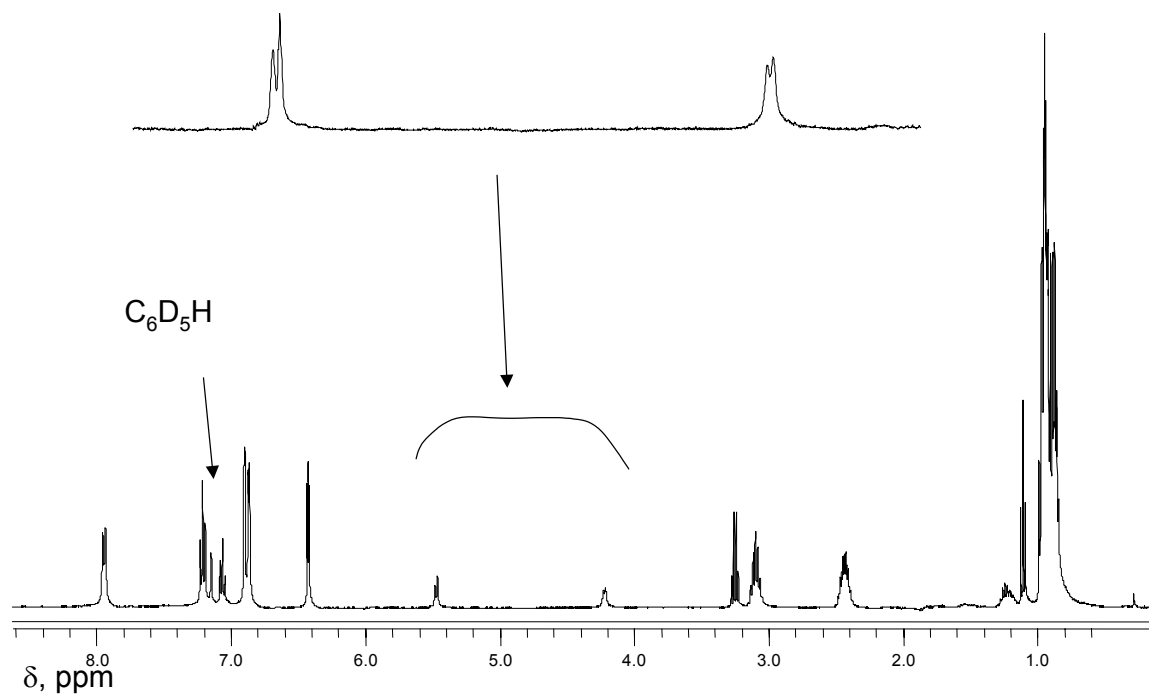

**Figure S8.**  $^1\text{H}$  NMR spectrum of 4 isotopomers of  $(\text{P}_2\text{C}=\text{RuCl}(-\text{CPh}=\text{C}(\text{H},\text{D})_2))$  (**10**) in  $\text{C}_6\text{D}_6$ .

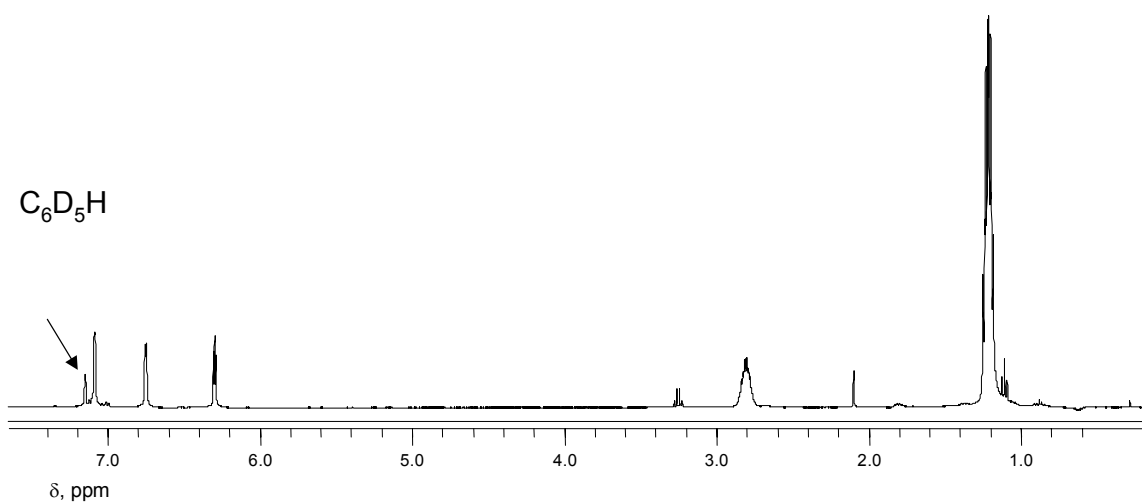

**Figure S9.**  $^1\text{H}$  NMR spectrum of  $(\text{P}_2\text{C}=\text{RuCl}_2)$  (**12**) in  $\text{C}_6\text{D}_6$  (traces of toluene, ether present).

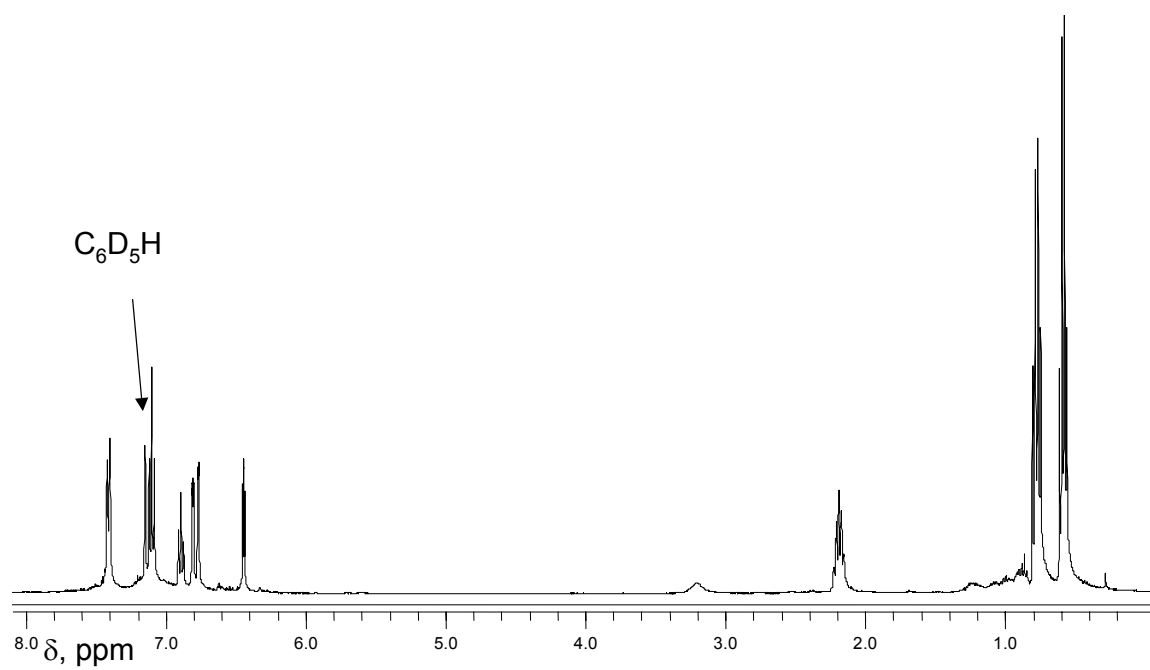

**Figure S10.**  $^1\text{H}$  NMR spectrum of  $(\text{P}_2\text{C}=\text{RuPh}_2)$  (**13**) in  $\text{C}_6\text{D}_6$  (traces of toluene, ether present).



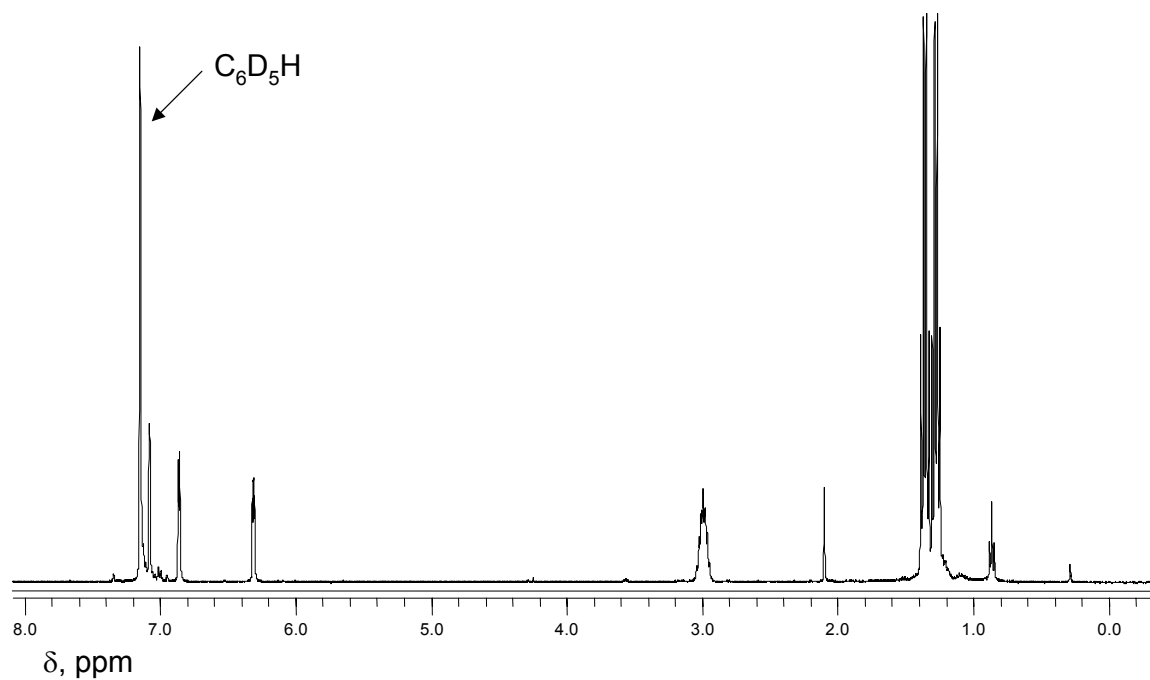

**Figure S11.**  $^1\text{H}$  NMR spectrum of *trans*-( $\text{P}_2\text{C}=\text{RuCl}_2(\text{CO})$ ) (**14a**) in  $\text{C}_6\text{D}_6$  (traces of toluene, pentane, grease present).

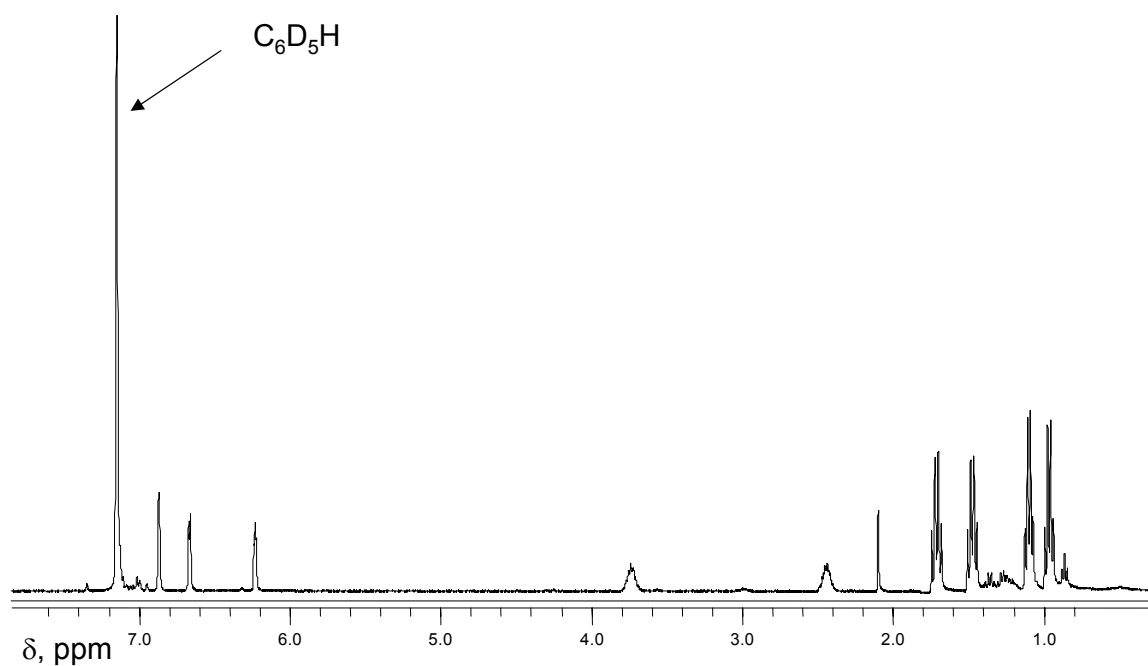

**Figure S12.**  $^1\text{H}$  NMR spectrum of *cis*-( $\text{P}_2\text{C}=\text{RuCl}_2(\text{CO})$ ) (**14b**) in  $\text{C}_6\text{D}_6$  (8% of **14a** and traces of toluene, ether present).
